# Supplementary material for: Multiple Nonglycemic Genomic Loci Are Newly Associated With Blood Level of Glycated Hemoglobin in East Asians
Source: PubMed Central journal article supplement — Diabetes. 2014 Jun 14;63(7):2551–62. doi: 10.2337/db13-1815 (PMC4284402; doi:10.2337/db13-1815), 2014-06-14
Supplement: supp_db13-1815_DB131815SupplementaryData.pdf [file supp_db13-1815_DB131815SupplementaryData.pdf]

## SUPPLEMENTARY DATA

### *Cohort descriptions*

#### **Stage 1 cohorts**

**Cardiometabolic Risk in Chinese (CRC) study** is a community-based health examination survey of 6,431 individuals (aged 18-93 years; 53.7% men) who were randomly selected from residents living in the urban area of Xuzhou, China in 2009. The study design has been described elsewhere [1]. Written consent was obtained from each participant. The study was reviewed and approved by the ethics committee of the Central Hospital of Xuzhou, Affiliated Hospital of Medical School of Southeast University, Nanjing, China. A total of 811 study samples were included in a GWAS that was carried out on Illumina Human660-Quad BeadChips at the Chinese National Human Genome Center in Shanghai, China. Genotype clustering was conducted with Illumina BeadStudio 3.3 software. Fasting glucose was measured using the hexokinase glucose-6-phosphate dehydrogenase method (Type 7600; Hitachi Ltd., Tokyo, Japan). HbA<sub>1c</sub> was measured using high performance liquid chromatography (HPLC; HLC-723G7 hemoglobin HPLC analyzer). The top 10 PCs and age were included as covariates in addition to the sex and BMI.

**Korea Association Resource (KARE)** is a part of the Korean Genome Analysis Project (KoGAP), was initiated in 2007 to conduct a large-scale genome-wide association study aiming to discover variants associated with Type 2 Diabetes (T2D) and numerous complex traits. The detailed information has been described elsewhere[2]. Briefly, a total of 10,038 participants aged 40 to 69 were recruited from two population-based cohorts comprising the rural Ansung (n=5,018) and urban Ansan (n=5,020) cohorts. The two cohorts were established as part of the Korean Genome Epidemiology Study (KoGES). All samples were genotyped with Affymetrix Genome-Wide Human SNP array 5.0. HbA<sub>1c</sub> was analyzed centrally with high performance liquid chromatography (Variant II, BioRad, Hercules, CA), and the values were converted to the diabetes control and complications trial (DCCT) aligned reference HbA<sub>1c</sub> [3].

**National Center for Global health and Medicine hospital-based cohort study (CAGE-NCGM)** aims to prospectively investigate the relationship between genetic and non-genetic factors. The participants were enrolled for the detailed examination of lifestyle and lifestyle-related diseases such as cardiovascular diseases, cancer, and diabetes mellitus. It constitutes a sub-cohort of the study group of the CArdiovascular Genomic Epidemiology (CAGE) Network [4]. Non-diabetic subjects were chosen from the clinical practice or the annual medical checkup of the NCGM hospital. The inclusion criteria were as follows: 1) no past history of urinary glucose or glucose intolerance; 2) HbA<sub>1c</sub>, <5.6% or a normal glucose (75g) tolerance test; and 3) age at examination, ≥55 years. Blood samples were drawn after an overnight fast to measure fasting plasma glucose (FPG) and HbA<sub>1c</sub> when applicable. FPG concentrations were measured by the glucose electrode method. HbA<sub>1c</sub> levels were measured by high-pressure liquid chromatography (HPLC), for which the routine measurement of HbA<sub>1c</sub> was standardized using a reference material, Lot2, certified by the Japan Diabetes Society.

**The Nutrition and Health of Aging Population in China (NHAPC)** is a population-based cohort study among 3,289 individuals (3,210 of them are Chinese Hans), aged 50 to 70 years, recruited from Beijing and Shanghai. The study design, methods and measurements of this cohort study have been described in detail elsewhere [5]. Briefly, the participants were recruited using a multistage sampling method from 2 urban districts and 1 rural district of each city. Data on demographic variables, health status, health behavior, and physical activity was collected using a standardized questionnaire. Standard anthropometric measurements and overnight fasting blood samples were collected using a standardized protocol when the participants attended a physical examination. The DNA samples were genotyped using the Illumina Human660W-Quad BeadChip (Illumina, Inc., San Diego, CA, USA). In total,

## SUPPLEMENTARY DATA

2,507 samples with genotypes, HbA<sub>1c</sub> measurements, and covariate information were included in this analysis.

**Singapore Malay Eye Study (SiMES)** aims to investigate the epidemiology of eye diseases and traits in Singaporean Malay. The study adopted a population-based, cross-sectional design. 3,280 Malay adults living in 15 residential districts in the southwestern part of Singapore were recruited [6]. All participants had 40 ml non-fasting venous blood drawn and collected in plain and fluoride oxalate tubes and stored at 4°C for a maximum of 4 h prior to processing. HbA<sub>1c</sub>, among other things, was measured at the National University Hospital Reference Laboratory, which is accredited by the College of American Pathologists. The HbA<sub>1c</sub> assay was carried out using an HPLC cation exchange chromatography system implemented on a Bio-Rad variant II analyser (Bio-Rad Laboratories, Hercules, CA, USA). The assay was accredited by the National Glycoprotein Standardization Program with controls traceable to the DCCT [7]. The DNA samples of 3,242 participants were genotyped using Illumina HumanHap 610 Quad SNP array. The first 2 PCs were included as covariates in addition to the sex and BMI in the association tests.

**Singapore Chinese Eye Study (SCES)** is the Chinese equivalent to SiMES, where the sampling was similarly performed in the same 15 residential districts and included 3,353 Chinese [8]. Non-fasting blood sample collection and HbA<sub>1c</sub> measurement were done in the same as in SiMES [7]. The DNA samples of 1,949 participants were genotyped using the Illumina HumanHap 610 Quad SNP array.

**Singapore Prospective Study Program (SP2)** comprised participants of the ages between 24 and 95 years from four previous cross-sectional studies: Thyroid and Heart Study (1982–1984) [9], National Health Survey (1992) [10], National University of Singapore Heart Study (1993–1995) [11] and the National Health Survey (1998) [12]. Each of these studies sampled individuals randomly from the Singapore population. A disproportionate sampling scheme was utilized to increase the sample sizes of the minority ethnic groups (Malays and Asian Indians). Between 2003 and 2007, 10,747 participants were invited to participate in a follow up study, of which 5,157 people completed the questionnaire and the subsequent clinical examination [13]. Only Chinese individuals were included in this study. The whole batch of 3,236 samples of which fasting blood samples have been taken, were divided into three cohorts as per the genotyping platform used, which are SP2-1M (genotyped by Illumina HumanHap 1Mduo), SP2-610 (610Quad) and SP2-550 (550K). HbA<sub>1c</sub> was measured using a HaemoCue Glucose Analyser (Ängelholm, Sweden).

**Taiwan Super Control Study (TWSC)** included 1000 randomly selected individuals, of which genetic data were extracted from the Han-Chinese Cell and Genome Bank in Taiwan [14]. In this Biobank, more than 3300 healthy controls were recruited via a stratified, 3-staged probability clustering sampling scheme through the registry of all the 329 non-aboriginal townships or city districts in Taiwan [15]. Their genomic DNA was extracted from peripheral blood using the Puregene DNA isolation kit (Gentra Systems, Minneapolis, MN, USA).

The **Singapore Chinese Health Study (SCHS)** is a cohort study of 63,257 Singaporean Chinese men and women of the Hokkien or Cantonese dialect group aged 45-74 years and residing in public housing estates (where 86% of Singaporeans live) [16]. The recruitment and the assessment of baseline diet and other characteristics through in-person interviews in the participants' home took place from 1993 to 1998 (response rate 85%). A follow-up telephone interview took place between 1999 and 2004 for 52,325 cohort members (83% of recruited cohort). By April 2005, all surviving cohort subjects had been contacted for biospecimen donation. Samples were obtained from 32,535 subjects, representing a consent rate of about 60%. The institutional review boards at the National University of Singapore, the University of Minnesota, and the University of Pittsburgh approved this study. Non-fasting venous blood was collected in 28,439 participants between 2000 and 2005. The cohort has been followed up

## SUPPLEMENTARY DATA

for mortality and morbidity through regular record linkage with the Singapore Cancer Registry, the Hospital Discharge Summary Database and the Singapore Registry of Births and Deaths through collaboration with the Ministry of Health. Percentage of HbA<sub>1c</sub> was analyzed in a Clinical Laboratory Improvement Amendments-certified laboratory using an automated high-performance liquid chromatography method where whole blood samples are treated with ethylenediaminetetraacetic acid on a Tosoh G7 HPLC Glycohemoglobin Analyzer (Tosoh Medics, Inc., San Francisco, California). Using the standards developed in the National Glycohemoglobin Standardization Program, this method of percentage of HbA<sub>1c</sub> assessment was calibrated to the reference range of 4.3%-6.0% (23 - 42 mmol/mol) and the laboratory coefficient of variation range was 1.4%-1.9%.

Two case-control sub cohorts were drawn from SCHS. They are SCHS Diabetes (SCHS-DB) and SCHS Coronary Heart Disease (SCHS-CHD), aiming to study the genetic and environmental risk factors of diabetes mellitus and coronary heart disease, respectively. For SCHS-DB, we excluded subjects with prevalent diabetes, cardiovascular disease, or cancer at the baseline interview, and those without stored tissue samples. 24,932 subjects remained. Among them, we identified 2,615 incident diabetes cases and 2,615 controls matched on age, gender, dialect group (Cantonese or Hokkien), and date of blood draw. A total of 4,677 samples (2338 cases and 2339 controls) remained after SNP array data QC. 2,009 controls with complete HbA<sub>1c</sub> < 6.0% and covariate information were included in this study. For SCHS-CHD, cases had fatal coronary heart disease or non-fatal myocardial infarction (MI) identified through the Singapore Registry of Births and Deaths and the Hospital Discharge Database respectively. For all non-fatal cases, medical records were retrieved for review by a cardiologist and we only included those that have confirmed myocardial infarction using the criteria of the Multi-Ethnic Study of Atherosclerosis. Cases of fatal CHD were only included if there was prior evidence of CHD based on the questionnaire data or the Hospital Discharge Database. We selected cases and matched controls using the risk-set sampling strategy. Controls were participants who were alive and free of coronary heart disease at the time of the diagnosis or death of the index cases and matched (1 to 2) for sex, dialect group, year of birth, year of recruitment and date of blood collection. Genotyping was performed for 2,136 SCHS samples using the Illumina OmniZhonghua array. After SNP array data QC, 1,024 controls and 457 cases remained with complete HbA<sub>1c</sub> and covariate information. Both cases and controls were included in this study, while the association analysis was done in cases and controls separately.

**Shanghai Breast Cancer Study (SBCS)** included two recruitment phases, as described in detail elsewhere [17,18]. During the initial phase (SBCS-I), 1,459 breast cancer patients and 1,556 controls were recruited between 1996 and 1998 through a rapid case-ascertainment system and the population-based Shanghai Cancer Registry. Blood samples were obtained from 1,193 (82%) cases and 1,310 (84%) controls. The second phase of participant recruitment (SBCS-II) was conducted between 2002 and 2005 using a protocol similar to the one used in SBCS-I. A total of 1,989 incident cases and 1,918 community controls were recruited. The majority of cases ( $n = 1,932$ , 97.1%) and controls ( $n = 1,857$ , 96.8%) provided a blood sample or an exfoliated buccal cell sample. Current study only included controls who have both HbA<sub>1c</sub> profile data and GWAS data.

### ***Stage 2 cohorts***

The **TaiChi** consortium was formed through a collaborative effort between investigators based in the U.S. and Taiwan. The consortium's primary aim is to identify genetic determinants of atherosclerosis and diabetes related traits in Han Chinese and to fine-map validated loci identified in other race/ethnic groups [19]. The main academic sites participating in the TaiChi consortium in Taiwan include Taichung Veteran's General Hospitals, Taipei Veterans General Hospital, National Health Research Institutes, Tri-Service General Hospital, and National Taiwan University Hospital. The main U.S. academic sites include Stanford University School of Medicine in Stanford, California; Hudson-Alpha Biotechnology

## SUPPLEMENTARY DATA

Institute in Huntsville, Alabama; Los Angeles BioMedical Research Institute at Harbor-UCLA Medical Center in Torrance, California; and Cedars-Sinai Medical Center (CSMC) in Los Angeles, California. TaiChi brings together 7 principal cohorts formed in Taiwan producing a bio-resource that includes a total of 11,859 subjects. For the current study, 1,984 of these subjects had HbA<sub>1c</sub> data and met inclusion criteria. PC1 was included in addition to sex and BMI in the association test. HbA<sub>1c</sub> was measured by HPLC, D-10 Hemoglobin A<sub>1c</sub> program, Bio RAD by Union Clinical Laboratory in 95% of the samples.

**The Kyushu University Fukuoka Cohort Study (CAGE-Fukuoka)** is a community-based prospective epidemiologic cohort of 12,959 subjects, who participated in the baseline survey during the period from February 2004 to August 2007 [20]. From this cohort, 12,569 subjects completed the questionnaire and also provided DNA for genotyping of SNPs to investigate lifestyle factors and genetic susceptibility of the so-called lifestyle-related diseases such as cardiovascular diseases, cancer, and diabetes mellitus. Since blood was not drawn strictly after an overnight fast, HbA<sub>1c</sub> was measured in all participants from the Kyushu University Fukuoka Cohort Study to evaluate impaired glucose metabolism. From the participants, 4,889 individuals were chosen as non-diabetic participants who met the following conditions: age  $\geq$ 55 years; HbA<sub>1c</sub>  $\leq$ 5.0%; no previous and/or current treatment for diabetes; and absence of renal failure (serum creatinine  $<$  265.2 mmol/l). HbA<sub>1c</sub> levels were measured by high-pressure liquid chromatography, as described in the section of NCGM Hospital-based Cohort Study.

**The Japanese Millenium Genome Project (JMGP)** comprises 8 independent study cohorts for studies of cardiovascular diseases and related risk factors. Among them, three cohorts of general Japanese population, namely AAC, Shigaraki, and Takashima were included in this analysis [21]. The AAC cohort subjects were consecutive participants of the medical check-up program at Ehime University Hospital anti-aging center. This check-up program is specifically designed to evaluate aging-related disorders, including atherosclerosis, cardiovascular disease, physical function and mild cognitive impairment. All clinical data used in this study were obtained through the check-up process. The Takashima study is an ongoing longitudinal study based on a community of residents living in Takashima City. Takashima City is an urban area located in Shiga prefecture with a population of approximately 54,000. Study subjects were recruited between 2002 and 2003 from participants in the annual medical check-up program performed by Takashima City office. The basic clinical parameters used in this study were obtained from the personal medical check-up records of the subjects. The Shigaraki study is another longitudinal study based on community residents in Shigaraki-town, a farming community located in Shiga prefecture. The Shigaraki study was based on a medical examination undertaken by Shigaraki-town Office in 1999. The basic clinical parameters used in this study were also obtained from the personal medical check-up records.

### Acknowledgements

We thank all the participants in this study.

SP2 acknowledges the support of the Yong Loo Lin School of Medicine, the National University Health System and the Life Sciences Institute from the National University of Singapore. We also acknowledge the support from the National Research Foundation (NRF-RF-2010-05), the Biomedical Research Council (under the individual research grants scheme) and the National Medical Research Council under the individual research grant and the clinician scientist award schemes).

SiMES is funded by National Medical Research Council (grants 0796/2003, IRG07nov013, IRG09nov014, STaR/0003/2008 and CG/SERI/2010) and Biomedical Research Council (grants 09/1/35/19/616),

## SUPPLEMENTARY DATA

Singapore. The Singapore Tissue Network and the Genome Institute of Singapore, Agency for Science, Technology and Research, Singapore provided services for tissue archival and genotyping, respectively. SCES is funded by Biomedical Research Council (grants 08/1/35/19/550) and National Medical Research Council (grants STaR/0003/2008 and CG/SERI/2010), Singapore. The National University Health System Tissue Repository and the Genome Institute of Singapore, Agency for Science, Technology and Research, Singapore provided services for tissue archival and genotyping, respectively. NHAPC was supported by research grants including the and National Key Basic Research Program of China (2012CB524900), the National High Technology Research and Development Program (2009AA022704), Knowledge Innovation Program (KSCX2-EW-R-10), and the National Natural Science Foundation of China (30930081, 81021002, 81170734).

SBCS was supported in part by U.S. National Institutes of Health grant R01CA124558, as well as Ingram Professorship and Research Reward funds from the Vanderbilt University School of Medicine. We want to thank Regina Courtney for plasma and DNA sample preparation, Ben Zhang and Jing He for data processing and analyses.

JMGP was supported by Grants for Scientific Research (Priority Areas "Medical Genome Science (Millennium Genome Project)" and "Applied Genomics" (20018020, 18018030, 12204008), and Scientific Research (24390084, 25293141, 23659352, 23659382, 21390099, 20390185, 19659163, 16790336, 11694285, 17390186, 20390184, and 24390165) from the Ministry of Education, Culture, Sports, Science, and Technology, Japan; a Health and Labor Sciences Research Grants (H15-Longevity, H15-genome, H17-longevity, H16-kenko, H18-longevity (kokusai)) from the Ministry of Health, Labor and Welfare, Japan; a Science and Technology Incubation Program in Advanced Regions, Japan Science and Technology Agency; National Cardiovascular Research Grants; Research grant from the Japan Atherosclerosis Prevention Found; Research grant from Ehime University.

Data contributed to this manuscript from Taichi was generated with support from the National Institutes of Health, USA [HL087647, HL088457, EY014684, DK079888], ARRA Supplement [EY014684-03S1, -04S1], the National Health Research Institutes, Taiwan [PH-100-SP-01, BS-094-PP-01, PH-100-PP-03], the National Science Council, Taiwan [NSC 98-2314-B-075A-002-MY3, NSC 96-2314-B-002-151, NSC 96-2314-B-002-152, NSC 98-2314-B-002-122-MY2, NSC 100-2314-B-002-115, NSC 101-2325-002-078, 101-2314-B-075A-006-MY3], the Taichung Veterans General Hospital, Taiwan [TCVGH-1013001C, TCVGH-1013002D], and the Cedars-Sinai Winnick Clinical Scholars Award. The provision of genotyping data was supported in part by the National Center for Advancing Translational Sciences, CTSI grant UL1TR000124, and the National Institute of Diabetes and Digestive and Kidney Disease Diabetes Research Center (DRC) grant DK063491 to the Southern California Diabetes Endocrinology Research Center.

Chew-Kiat Heng and Yechiel Friedlander received grants from NUS-HUJ CREATE Programme of the National Research Foundation, Singapore (Project Number 370062002). The SCHS-CHD case-control study led by Rob M. van Dam received grants from National Medical Research Council of Singapore.

The CAGE Network Studies were supported by grants for the Core Research for Evolutional Science and Technology (CREST) from the Japan Science Technology Agency; the Program for Promotion of Fundamental Studies in Health Sciences, National Institute of Biomedical Innovation Organization (NIBIO); KAKENHI (Grant-in-Aid for Scientific Research) on Priority Areas "Applied Genomics" from the Ministry of Education, Culture, Sports, Science and Technology of Japan; and the Grant of National Center for Global Health and Medicine (NCGM).

KARE was supported by grants from Korea Centers for Disease Control and Prevention (4845-301, 4851-302, 4851-307) and an intramural grant from the Korea National Institute of Health (2010-N73002-00), the Republic of Korea.

## SUPPLEMENTARY DATA

TWSC gratefully acknowledges the members of the Translational Resource Center (TRC) (NSC102-2325-B-001-040) and the National Center for Genome Medicine (NCGM) (NSC102-2319-B-001-001) at Academia Sinica for their support in subject recruitment, genotyping and statistical analysis. The TWSC study was supported by the Academia Sinica Genomic Medicine Multicenter Study, Taiwan (40-05-GMM).

Dr. Lu Qi was supported by grants from the National Heart, Lung, and Blood Institute (HL071981), the National Institute of Diabetes and Digestive and Kidney Diseases (DK091718), the Boston Obesity Nutrition Research Center (DK46200), and United States – Israel Binational Science Foundation Grant2011036. Dr. Lu Qi was a recipient of the American Heart Association Scientist Development Award (0730094N).

AAC study also acknowledges Yasuharu Tabara, Katsuhiko Kohara, Michia Igase and Tetsuro Miki for their contributions in the data acquisition in this study.

Shigaraki study also acknowledges Hirotsugu Ueshima, Yoshikuni Kita and Yasuyuki Nakamura for their contributions in the data acquisition in this study.

Takashima study also acknowledges Yoshikuni Kita, Hirotsugu Ueshima and Naoyuki Takashima for their contributions in the data acquisition in this study.

Part of the data on glycaemic traits have been contributed by MAGIC investigators and have been downloaded from [www.magicinvestigators.org](http://www.magicinvestigators.org).

The founding, long-standing Principal Investigator of the Singapore Chinese Health Study is Mimi C. Yu. Funding Sources for the SCHS include the following: Genetic and Environmental Determinants of Type 2 Diabetes in Chinese Singaporeans, R01 DK080720. U.S. NIH (PIs: Mark A. Pereira and Myron D. Gross), The National Medical Research Council of Singapore under the Individual Research Grants Scheme, the Genome Institute of Singapore, National Medical Research Council of Singapore under its individual research grant and clinician scientist award scheme, and from the Agency for Science, Technology and Research, Singapore. The main Singapore Chinese Health Study primary cohort has been supported long-term by U.S. NIH/NCI grants: R01 CA55069, R35 CA53890, R01 CA80205, and R01 CA144034. Siew-Hong Low of the National University of Singapore for supervised the field work of the Singapore Chinese Health Study and Kazuko Arakawa worked on the development of the cohort study database. Significant contributions to the diabetes GWAS substudy of SCHS were made by Woon-Puay Koh, Jian-Min Yuan, Renwei Wang, Zhanghua Chen, Mark Seielstad, Andrew O. Odegaard, E. Shyong Tai, Yik-Ying Teo, Jianjun Liu, Bharat Thyagarajan, and Revati Koratkar.

### **Cohorts for Heart and Aging Research in Genome Epidemiology (CHARGE) Consortium**

The authors acknowledge the essential role of the Cohorts for Heart and Aging Research in Genome Epidemiology (CHARGE) Consortium in development and support of this manuscript. CHARGE members include The Netherland's Rotterdam Study (RS), Framingham Heart Study (FHS), Cardiovascular Health Study (CHS), the NHLBI's Atherosclerosis Risk in Communities (ARIC) Study, and the NIA's Iceland Age, Gene/Environment Susceptibility (AGES) Study.

### **Age, Gene/Environment Susceptibility-Reykjavik Study (AGES)**

The Age, Gene/Environment Susceptibility Reykjavik Study is funded by NIH contract N01-AG-12100, the NIA Intramural Research Program, Hjartavernd (the Icelandic Heart Association) and the Althingi (the Icelandic Parliament).

### **The Atherosclerosis Risk in Communities Study (ARIC)**

The Atherosclerosis Risk in Communities Study is carried out as a collaborative study supported by National Heart, Lung, and Blood Institute contracts N01-HC-55015, N01-HC-55016, N01-HC-55018, N01-HC-55019, N01-HC-55020, N01-HC-55021, and N01-HC-55022. The authors thank the staff and participants of the ARIC study for their important contributions.

## SUPPLEMENTARY DATA

### **The Cardiovascular Health Study (CHS)**

This CHS research was supported by NHLBI contracts HHSN268201200036C, HHSN268200800007C, N01HC55222, N01HC85079, N01HC85080, N01HC85081, N01HC85082, N01HC85083, N01HC85086; and NHLBI grants HL080295, HL087652, HL105756 with additional contribution from the National Institute of Neurological Disorders and Stroke (NINDS). Additional support was provided through AG023629 from the National Institute on Aging (NIA). A full list of CHS investigators and institutions can be found at <http://www.chs-nhlbi.org/pi.htm>. The provision of genotyping data was supported in part by the National Center for Advancing Translational Sciences, CTSI grant UL1TR000124, and the National Institute of Diabetes and Digestive and Kidney Disease Diabetes Research Center (DRC) grant DK063491 to the Southern California Diabetes Endocrinology Research Center.

### **Framingham Heart Study (FHS)**

The National Heart, Lung, and Blood Institute's Framingham Heart Study is a joint project of the National Institutes of Health and Boston University School of Medicine and was supported by the National Heart, Lung, and Blood Institute's Framingham Heart Study (contract No. N01-HC-25195) and its contract with Affymetrix, Inc. for genotyping services (contract No. N02-HL-6-4278). Analyses reflect the efforts and resource development from the Framingham Heart Study investigators participating in the SNP Health Association Resource (SHARe) project. A portion of this research was conducted using the Linux Cluster for Genetic Analysis (LinGA-II) funded by the Robert Dawson Evans Endowment of the Department of Medicine at Boston University School of Medicine and Boston Medical Center.

### **The Invecchiare in Chianti (InCHIANTI)**

The InCHIANTI Study was supported as a "targeted project" (ICS 110.1RS97.71) by the Italian Ministry of Health, by the U.S. National Institute on Aging (Contracts N01-AG-916413, N01-AG-821336, 263 MD 9164 13, and 263 MD 821336) and in part by the Intramural Research Program, National Institute on Aging, National Institutes of Health, USA.

### **Rotterdam Study (RS)**

Rotterdam Study: The GWAS database of the Rotterdam Study was funded through the Netherlands Organization of Scientific Research NWO (nr. 175.010.2005.011, 911.03.012) and the Research Institute for Diseases in the Elderly (RIDE). This study was supported by the Netherlands Genomics Initiative (NGI)/NWO project number 050 060 810 (Netherlands Consortium for Healthy Ageing). We thank Dr Michael Moorhouse, Pascal Arp, Mila Jhamai, Marijn Verkerk and Sander Bervoets for their help in creating the genetic database. We thank the laboratory technicians Jeannette M Vergeer - Drop, Bernadette H M van Ast - Copier, Andy A L J van Oosterhout, Sue Ellen Mauricia, Andrea J M Vermeij - Verdoold, Els Halbmeijer - van der Plas, Debby M S Lont, and Hasna Kariouh for their help in phenotype assessment. The Rotterdam Study is supported by the Erasmus Medical Center and Erasmus University, Rotterdam; the Netherlands organization for scientific research (NWO), the Netherlands Organization for the Health Research and Development (ZonMw), the Research Institute for Diseases in the Elderly (RIDE), the Netherlands Heart Foundation, the Ministry of Education, Culture and Science, the Ministry of Health, Welfare and Sports, the European Commission (DG XII), and the Municipality of Rotterdam. Disclosures: None.

### **Twins UK**

Twins UK (TUK): The study was funded by the Wellcome Trust; European Community's Seventh Framework Programme (FP7/2007-2013)/grant agreement HEALTH-F2-2008-201865-GEFOS and (FP7/2007-2013), ENGAGE project grant agreement HEALTH-F4-2007-201413 and the FP-5 GenomEUtwin Project (QLG2-CT-2002-01254). The study also receives support from the Dept of Health via the National Institute for Health Research (NIHR) comprehensive Biomedical Research Centre award to Guy's & St Thomas' NHS Foundation Trust in partnership with King's College London. TDS is

## SUPPLEMENTARY DATA

an NIHR senior Investigator. The project also received support from a Biotechnology and Biological Sciences Research Council (BBSRC) project grant. (G20234). Genotyping of TwinsUK samples: We thank the staff from the Genotyping Facilities at the Wellcome Trust Sanger Institute for sample preparation, Quality Control and Genotyping led by Leena Peltonen and Panos Deloukas; Le Centre National de Génotypage, France, led by Mark Lathrop, for genotyping; Duke University, North Carolina, USA, led by David Goldstein, for genotyping; and the Finnish Institute of Molecular Medicine, Finnish Genome Center, University of Helsinki, led by Aarno Palotie.

### **KORA**

The MONICA/KORA Augsburg studies were financed by the Helmholtz Zentrum München, German Research Center for Environmental Health, Neuherberg, Germany and supported by grants from the German Federal Ministry of Education and Research (BMBF). Part of this work was financed by the German National Genome Research Network (NGFN) and supported within the Munich Center of Health Sciences (MC Health) as part of LMUinnovativ. We gratefully acknowledge the contribution of H-E Wichmann (PI), T. Meitinger (PI), P. Lichtner, G. Eckstein and all other members of the Helmholtz Zentrum München genotyping staff in generating the SNP dataset. We thank all members of field staffs who were involved in the planning and conduct of the MONICA/KORA Augsburg studies.

### **Study of Health in Pomerania (SHIP)**

SHIP is part of the Community Medicine Research net of the University of Greifswald, Germany, which is funded by the Federal Ministry of Education and Research (grants no. 01ZZ9603, 01ZZ0103, and 01ZZ0403), the Ministry of Cultural Affairs as well as the Social Ministry of the Federal State of Mecklenburg-West Pomerania. Genome-wide data have been supported by the Federal Ministry of Education and Research (grant no. 03ZIK012) and a joint grant from Siemens Healthcare, Erlangen, Germany and the Federal State of Mecklenburg-West Pomerania. The University of Greifswald is a member of the 'Center of Knowledge Interchange' program of the Siemens AG.

### **UK Blood Services collection of Common Controls (UKBS1)**

We acknowledge use of genotype and phenotype information from The UK Blood Services collection of Common Controls (UKBS collection), funded by the Wellcome Trust grant 076113/C/04/Z, by the Juvenile Diabetes Research Foundation grant WT061858, and by the National Institute of Health Research of England. The collection was established as part of the Wellcome Trust Case-Control Consortium.

### **CHARGE Hematology Working Group**

Santhi K. Ganesh, Neil A. Zaki, Frank J A. van Rooij, Albert V. Smith, Ming-Huei Chen, Michael Nalls, Nicole L. Glazer, Abbas Dehghan, Thor Aspelund, Qiong Yang, Toshiko Tanaka, Andrew Jaffe, Joshua C M. Bis, Germaine C Verwoert, Caroline S. Fox, Jack M. Guralnik, Georg Ehret, Kenneth Rice, Ben A. Oostra, Gudny Eiriksdottir, Daniel Levy, Kushang V. Patel, Jerome I. Rotter, Albert Hofman, Dena Hernandez, Gang Zheng, Andrew B. Singleton, Josef Coresh, Thomas Lumley, André G. Uitterlinden, Lenore J. Launer, L. Adrienne Cupples, Cornelia M. van Duijn, Vilmundur Gudnason, Janine F Felix, Bruce M. Psaty, Luigi Ferrucci, Christopher J. O'Donnell, Jacqueline C M. Witteman, Susan Furth, Mary Cushman, Tamara B. Harris, JingPing Lin, Margaux Keller, Dena Hernandez.



SUPPLEMENTARY DATA

**Supplementary Figure 1.** Q-Q plot of the Stage 1 meta-analysis with/without known SNPs. The expected P values (X-axis) are plotted against the observed P-values (Y-axis). The units of the axes are the  $-\log_{10}$  of the P-value. The black and red curves represent the plots with and without the SNPs in LD ( $r^2 > 0.2$ ) with known SNPs associated with HbA<sub>1c</sub> respectively. The diagonal line of the null hypothesis and its 95% confidence interval were plotted in grey based on the P-values without the previously reported SNPs.

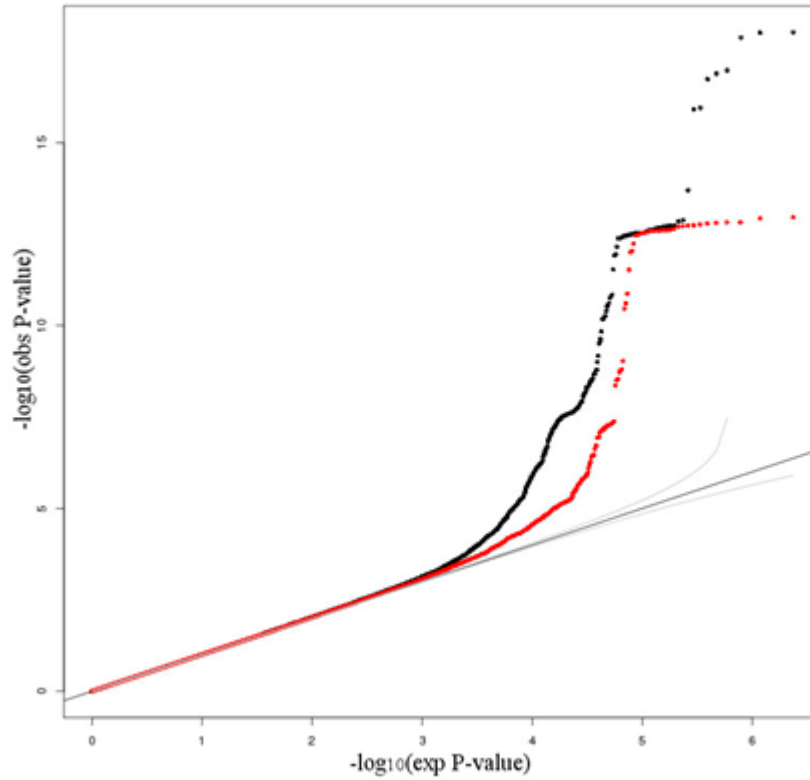

SUPPLEMENTARY DATA

**Supplementary Figure 2.** Regional association plot of the known loci. P-values are plotted against the genomic coordinates. The index SNPs are indicated in purple, with circles for Stage 1 and diamonds for Stage 1+2. Other SNPs are colored from red to blue as per their LD with the index SNP.

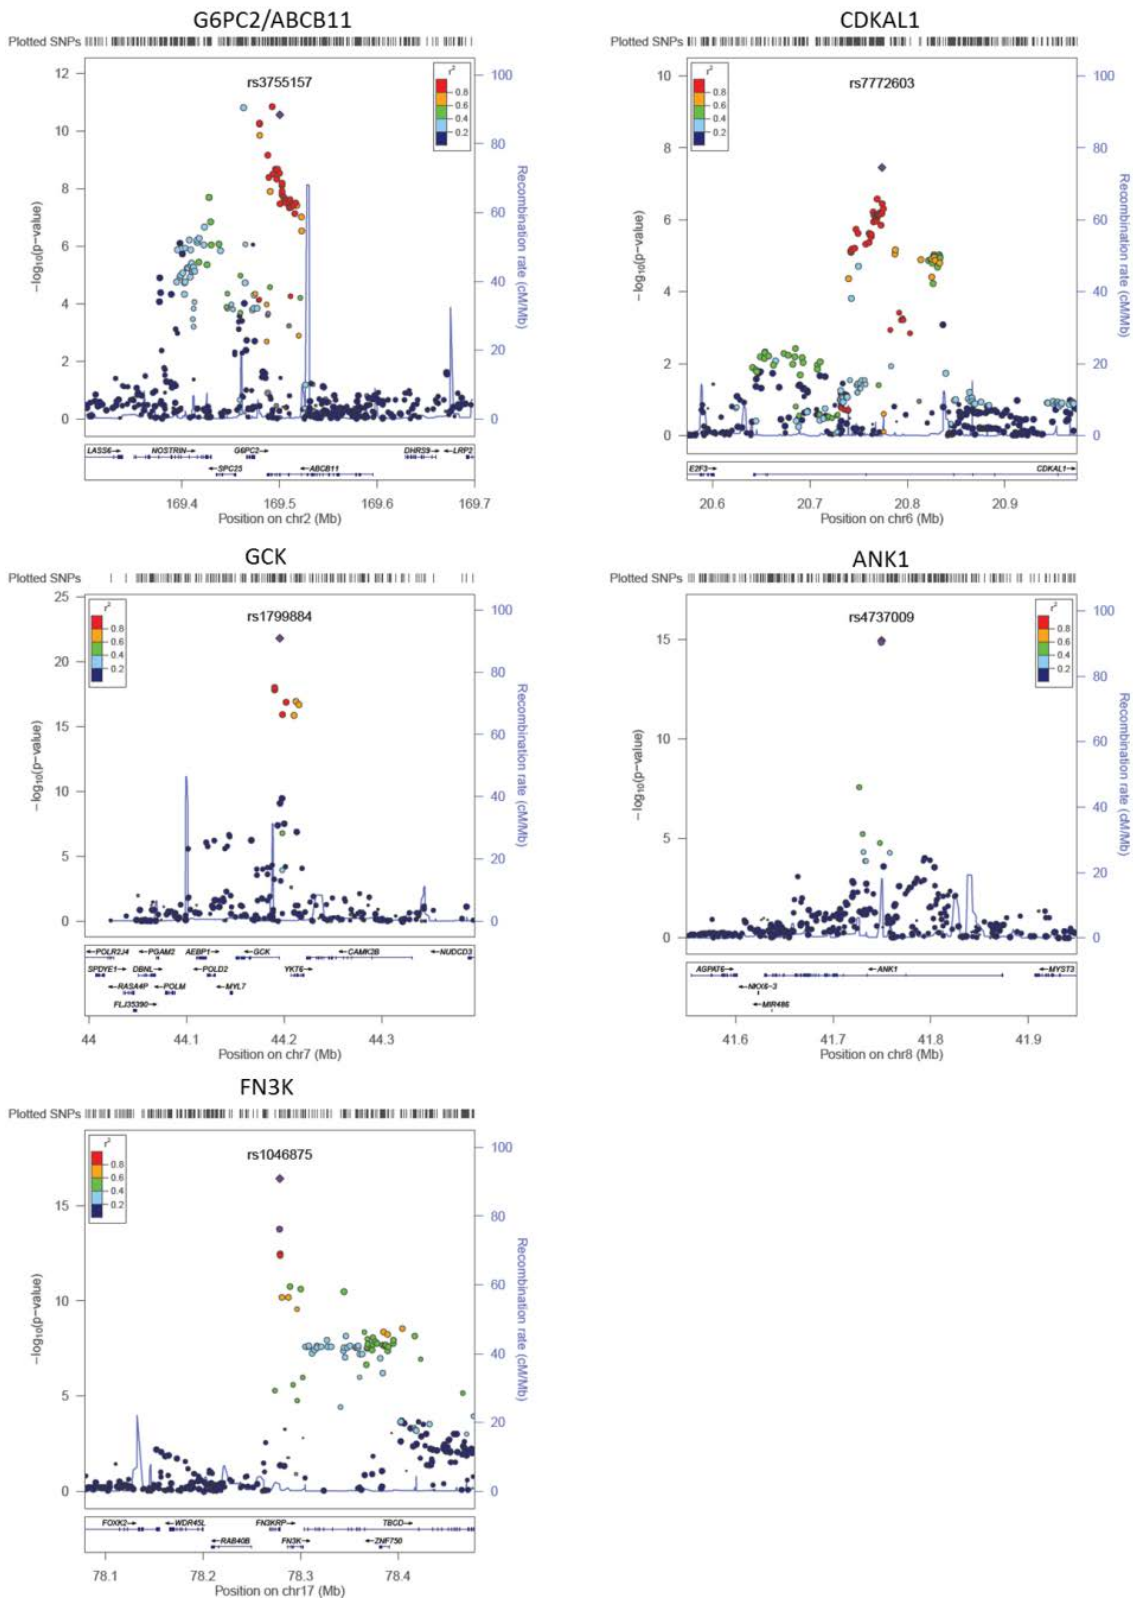

SUPPLEMENTARY DATA

**Supplementary Table 1.** Genotyping, QC, imputation and association testing in each study.

| Study Name     | Genotyping             | Sample QC |                      |                    |                |                    | SNP QC    |             |      | Imputation                       | Association Testing | Exclusion      |     |                     |
|----------------|------------------------|-----------|----------------------|--------------------|----------------|--------------------|-----------|-------------|------|----------------------------------|---------------------|----------------|-----|---------------------|
|                |                        | Call rate | Cryptic relationship | Population outlier | Heterozygosity | Gender consistency | Call rate | HWE P value | MAF  | Reference Panel (HapMap Phase 2) |                     |                |     | Imputation software |
| <b>Stage 1</b> |                        |           |                      |                    |                |                    |           |             |      |                                  |                     |                |     |                     |
| CRC            | Illu 660Quad           | 95%       | Yes                  | Yes                | Yes            | Yes                | 98%       | 1E-6        | 1%   | R22 JPT+CHB                      | MACH 1.0            | Plink v1.07    | Yes | no                  |
| KARE           | Affy 5.0               | 98%       | yes                  | yes                | yes            | yes                | 95%       | 1E-6        | 1%   | r22 JPT+CHB                      | IMPUTE V1.0         | Plink v1.07    | Yes | No                  |
| CAGE-NCGM      | Illu 550               | 90%       | yes                  | yes                | yes            | yes                | 95%       | 1E-6        | 1%   | r24 JPT+CHB                      | BEAGLE v3.0.4       | PLINK v1.06    | Yes | Yes                 |
| NHAPC          | Illu 660W              | 97%       | yes                  | yes                | yes            | yes                | 99%       | 1E-6        | 1%   | r22 JPT+CHB                      | IMPUTE v2.1         | SNPTEST v2.2.0 | yes | no                  |
| SCES           | Illu 610Quad           | 95%       | yes                  | yes                | yes            | yes                | 95%       | 1E-6        | none | r22 JPT+CHB                      | IMPUTE v2.2         | SNPTEST v2.4.1 | No  | Yes                 |
| SiMES          | Illu 610Quad           | 95%       | yes                  | yes                | yes            | yes                | 95%       | 1E-6        | none | r22 JPT+CHB+CEU+YRI              | IMPUTE v0.5         | SNPTEST v2.4.1 | No  | Yes                 |
| SP2-610        | Illu 610Quad           | 95%       | yes                  | yes                | yes            | yes                | 95%       | 1E-6        | none | r22 JPT+CHB                      | IMPUTE v0.5         | SNPTEST v2.4.1 | Yes | Yes                 |
| SP2-1M         | Illu 1MDuo             | 95%       | yes                  | yes                | yes            | yes                | 95%       | 1E-6        | none | r22 JPT+CHB                      | IMPUTE v0.5         | SNPTEST v2.4.1 | Yes | Yes                 |
| SP2-550        | Illu 550 v3            | 95%       | yes                  | yes                | yes            | yes                | 95%       | 1E-6        | none | r22 JPT+CHB                      | IMPUTE v0.5         | SNPTEST v2.4.1 | Yes | Yes                 |
| TWSC           | Illu 550Duo            | 95%       | yes                  | yes                | yes            | yes                | 95%       | 1E-4        | 1%   | r22 JPT+CHB                      | MACH 1.0            | PLINK v1.07    | No  | Yes                 |
| SCHS-CHD       | Illu Omni Zhonghua8    | 98%       | yes                  | yes                | yes            | yes                | 95%       | 1E-5        | 1%   | r22 JPT+CHB                      | IMPUTE v2           | SNPTEST v2.4.1 | No  | YES                 |
| SBCS           | Affy 6.0               | 95%       | yes                  | yes                | yes            | yes                | 95%       | 1E-6        | 1%   | r22 JPT+CHB                      | MACH 1.0            | mach2qtl       | Yes | Yes                 |
| SCHS-DB        | Affy Axiom             | 98%       | yes                  | yes                | yes            | yes                | 99%       | 1E-4        | none | r22 JPT+CHB                      | IMPUTE v2           | SAS 9.2        |     |                     |
| <b>Stage 2</b> |                        |           |                      |                    |                |                    |           |             |      |                                  |                     |                |     |                     |
| TaiChi         | Illu Cardio-MetaboChip | 98%       | yes                  | yes                | yes            | yes                | 97%       | 1E-7        | 1%   | NA                               | NA                  | Plink          | yes | yes                 |
| CAGE-Fukuoka   | TaqMan                 | no        | no                   | no                 | no             | no                 | no        | 1E-4        | none | NA                               | NA                  | R v2.14.1      | No  | Yes                 |
| JMGP           | TaqMan                 | no        | no                   | no                 | no             | no                 | no        | no          | no   | NA                               | NA                  |                | Yes | No                  |

## SUPPLEMENTARY DATA

**Supplementary Table 2.** Heterogeneity test of the effects in the recruited cohorts.

| SNP        | Gene         | HetISq | HetPVal |
|------------|--------------|--------|---------|
| rs540078   | PSMD13       | 39.6   | 0.052   |
| rs9933309  | CYBA         | 0.0    | 0.539   |
| rs11667918 | MYO9B        | 32.3   | 0.104   |
| rs6684514  | TMEM79       | 0.0    | 0.709   |
| rs174570   | FADS2        | 25.0   | 0.166   |
| rs1467311  | 9q31.2       | 26.5   | 0.151   |
| rs9399137  | HBS1L/MYB    | 12.3   | 0.313   |
| rs1046875  | FN3K         | 37.0   | 0.074   |
| rs13266634 | SLC30A8      | 10.2   | 0.341   |
| rs1799884  | GCK          | 0.0    | 0.678   |
| rs3755157  | G6PC2/ABCB11 | 43.3   | 0.043   |
| rs4737009  | ANK1         | 8.3    | 0.361   |
| rs7772603  | CDKAL1       | 0.0    | 0.581   |

HetISq is the I<sup>2</sup> statistics of heterogeneity;  
HetPVal is the P-value for heterogeneity.

## SUPPLEMENTARY DATA

**Supplementary Table 3.** LD between index SNPs identified in this study and index SNPs identified previously at the known loci. The degree of linkage disequilibrium ( $r^2$ ) is provided for HapMap CEU and JPT+CHB panels separately. The minor allele frequency (MAF) of the index SNP is presented in HapMap CEU / JPT+CHB panels, where MAF (EA) represents the MAF of the East Asian index SNP and MAF (Reported) represents the index SNP in the published GWAS. The references are also given for each reported index SNP. Soranzo *et. al.* refers to Supplementary Reference [22]; Pare *et. al.* refers to Supplementary Reference [23]; Ryu *et. al.* refers to Supplementary Reference [24]; Franklin *et. al.* refers to Supplementary Reference [25]. Reported ancestry refers to the population ancestry in which the association of the reported index SNP was discovered for the first time.

| Gene         | East Asian | Reported  | Distance | $r^2$       |             | MAF (EA)  | MAF (Reported) | reference     | Reported |
|--------------|------------|-----------|----------|-------------|-------------|-----------|----------------|---------------|----------|
|              | Index SNP  | Index SNP |          | CEU         | JPT+CHB     |           |                |               | Ancestry |
| G6PC2/ABCB11 | rs3755157  | rs552976  | 733      | <b>0.05</b> | <b>0.00</b> | 0.09/0.39 | 0.35/0.01      | Soranzo et.al | European |
| GCK          | rs1799884  | rs1799884 | 0        | 1.00        | 1.00        | 0.20/0.19 | 0.20/0.19      | Soranzo et.al | European |
|              |            | rs730497  | 5,347    | 1.00        | 1.00        | 0.20/0.19 | 0.20/0.19      | Pare et.al    | European |
| ANK1         | rs4737009  | rs4737009 | 0        | 1.00        | 1.00        | 0.28/0.46 | 0.28/0.46      | Soranzo et.al | European |
|              |            | rs6474359 | 81,211   | <b>0.00</b> | <b>0.01</b> | 0.28/0.46 | 0.03/0.07      | Soranzo et.al | European |
| FN3K         | rs1046875  | rs1046896 | 107      | 1.00        | 1.00        | 0.25/0.47 | 0.25/0.47      | Soranzo et.al | European |
| CDKAL1       | rs7772603  | rs7747752 | 59,477   | <b>0.17</b> | 0.61        | 0.31/0.39 | 0.21/0.46      | Ryu et.al     | Korean   |

## SUPPLEMENTARY DATA

**Supplementary Table 4.** The association of the index SNPs reaching genome-wide significance in association with HbA<sub>1c</sub> in our study with T2D, fasting glucose and 2hr oral glucose challenge test. The Stage 1 index SNPs were looked up in DIAGRAM T2D study [26] and MAGIC fasting glucose and 2HR oral glucose challenge study [27,28], AGEN T2D study [29], and a Korean fasting glucose study [30]. Statistical significance was defined after Bonferroni correction at P-value < 0.05/9/5 ≈ 1.1 x 10<sup>-3</sup>. The statistically significant loci are highlighted in bold.

| SNP         | rs6684514 | rs3755157      | rs7772603      | rs9399137 | rs1799884      | rs4737009 | rs9933309 | rs1046875 | rs11667918 |
|-------------|-----------|----------------|----------------|-----------|----------------|-----------|-----------|-----------|------------|
| Gene        | TMEM79    | G6PC2/ABCB11   | CDKAL1         | HBS1L/MYB | GCK            | ANK1      | CYBA      | FN3K      | MYO9B      |
| MAGIC FG    | 2.2E-02   | <b>1.9E-09</b> | 1.3E-02        | 1.3E-03   | <b>6.4E-37</b> | 2.7E-01   | 6.0E-01   | 3.0E-01   | 1.1E-01    |
| MAGIC 2HR   | 5.9E-01   | 6.9E-01        | 1.4E-01        | 4.3E-01   | <b>2.7E-04</b> | 9.4E-01   | 6.4E-01   | 4.9E-01   | 9.2E-02    |
| AGEN T2D    | 1.9E-02   | 4.0E-01        | <b>6.3E-15</b> | 3.3E-01   | 4.6E-01        | 3.0E-01   | 9.2E-01   | 3.0E-01   | 6.6E-01    |
| AGEN FG     | 1.2E-01   | <b>5.2E-31</b> | <b>2.1E-07</b> | 9.3E-01   | <b>3.6E-27</b> | 3.3E-01   | 2.3E-01   | 4.4E-01   | 7.3E-01    |
| Diagram T2D | 6.5E-01   | 8.3E-02        | <b>1.3E-15</b> | 1.3E-01   | 4.2E-02        | 1.4E-01   | 6.2E-01   | 6.9E-01   | 7.3E-01    |

**Supplementary Table 5.** The effects of the association with T2D, fasting glucose and 2hr oral glucose challenge test of the HbA<sub>1c</sub> index SNPs.

| SNP         | rs6684514 | rs3755157     | rs7772603    | rs9399137 | rs1799884    | rs4737009 | rs9933309 | rs1046875 | rs11667918 |
|-------------|-----------|---------------|--------------|-----------|--------------|-----------|-----------|-----------|------------|
| Gene        | TMEM79    | G6PC2/ABCB11  | CDKAL1       | HBS1L/MYB | GCK          | ANK1      | CYBA      | FN3K      | MYO9B      |
| Alleles     | G/A       | C/T           | C/T          | C/T       | T/C          | A/G       | T/C       | A/G       | C/T        |
| MAGIC FG    | 0.009     | <b>-0.035</b> | 0.010        | -0.013    | <b>0.062</b> | 0.005     | -0.003    | 0.004     | 0.007      |
| MAGIC 2HR   | 0.011     | -0.011        | 0.030        | -0.017    | <b>0.096</b> | -0.002    | 0.015     | 0.016     | 0.036      |
| AGEN T2D    | 0.940     | 1.021         | <b>1.210</b> | 0.975     | 1.022        | 0.971     | 0.997     | 1.024     | 1.013      |
| AGEN FG     | 0.016     | <b>-0.107</b> | <b>0.050</b> | -0.001    | <b>0.122</b> | 0.009     | 0.015     | 0.007     | -0.003     |
| Diagram T2D | 1.010     | 1.050         | <b>1.170</b> | 1.030     | 1.050        | 1.030     | 1.010     | 1.010     | 1.010      |

The effects in bold are those significant as showed in Supplementary Table S4. For the T2D associations, the effects are given as odds ratio, while others are the beta coefficients.

SUPPLEMENTARY DATA

**Supplementary Table 6.** Comparison of the allele frequency, effect size and P-value for known variants associated with HbA<sub>1c</sub> between the previous study and this study. The previous reports include Soranzo et. al. [22], Pare et. al. [23], Ryu et. al [24] and Franklin et. al. [25]. The effect allele frequencies are from HapMap phase 2 release 22 CEU and JPT+CHB panels, depending on the ancestry of the study. The effect allele, effect and P-value information of Soranzo *et. al.* were downloaded from <http://www.magicinvestigators.org/>.

| SNP        | Gene               | Effect_Allele | AGEN    |        |      | Previous GWAS |        |      |          |          |
|------------|--------------------|---------------|---------|--------|------|---------------|--------|------|----------|----------|
|            |                    |               | P       | Effect | Freq | P             | Effect | Freq | Ancestry | First    |
| rs4737009  | ANK1               | A             | 7.6E-15 | 0.09   | 0.46 | 6.0E-12       | 0.03   | 0.28 | European | Soranzo  |
| rs6474359  | ANK1               | T             | 8.2E-03 | -0.08  | 0.07 | 1.0E-08       | 0.06   | 0.03 | European | Soranzo  |
| rs7998202  | ATP11A<br>/TUBGCP3 | G             | 1.2E-02 | 0.07   | 0.09 | 5.0E-09       | 0.03   | 0.17 | European | Soranzo  |
| rs7747752  | CDKAL1             | C             | 8.0E-06 | 0.05   | 0.46 | 1.0E-11       | 0.01   | 0.21 | Asian    | Ryu      |
| rs1046896  | FN3K               | T             | 1.4E-13 | 0.07   | 0.47 | 2.0E-26       | 0.03   | 0.25 | European | Soranzo  |
| rs1402837  | G6PC2<br>/ABCB11   | A             | 5.8E-07 | 0.07   | 0.47 | 5.0E-10       | 0.03   | 0.30 | European | Pare     |
| rs552976   | G6PC2<br>/ABCB11   | G             | 5.3E-01 | 0.03   | 0.01 | 8.0E-18       | 0.03   | 0.35 | European | Soranzo  |
| rs1799884  | GCK                | T             | 2.7E-19 | 0.12   | 0.19 | 1.0E-20       | 0.04   | 0.20 | European | Soranzo  |
| rs730497   | GCK                | A             | 3.7E-19 | 0.12   | 0.19 | 6.0E-12       | 0.04   | 0.20 | European | Pare     |
| rs1800562  | HFE                | G             | NA      | NA     | 0.00 | 3.0E-20       | 0.06   | 0.04 | European | Soranzo  |
| rs16926246 | HK1                | C             | NA      | NA     | 0.02 | 3.0E-54       | 0.09   | 0.11 | European | Soranzo  |
| rs7072268  | HK1                | A             | 8.4E-02 | 0.02   | 0.28 | 2.0E-25       | 0.02   | 0.44 | European | Pare     |
| rs1387153  | MTNR1B             | T             | 2.8E-02 | 0.03   | 0.50 | 4.0E-11       | 0.03   | 0.28 | European | Soranzo  |
| rs13266634 | SLC30A8            | A             | 1.5E-07 | -0.05  | 0.46 | 5.0E-08       | -0.02  | 0.30 | European | Pare     |
| rs2779116  | SPTA1              | T             | 1.0E-04 | 0.04   | 0.38 | 3.0E-09       | 0.02   | 0.32 | European | Soranzo  |
| rs7903146  | TCF7L2             | C             | 5.8E-01 | -0.02  | 0.02 | 1.0E-07       | -0.01  | 0.25 | European | Franklin |
| rs855791   | TMPRSS6            | A             | 1.3E-04 | 0.05   | 0.45 | 3.0E-14       | 0.03   | 0.39 | European | Soranzo  |

**Supplementary Table 7.** Comparison of the allele frequency, effect size and P-value for novel variants identified in this study compared to those observed in the populations of European ancestry [22]. The effect allele frequencies are from HapMap phase 2 release 22 JPT+CHB and CEU panels, respectively.

| SNP        | Gene      | Effect_Allele | AGEN    |        |      | MAGIC   |        |      |
|------------|-----------|---------------|---------|--------|------|---------|--------|------|
|            |           |               | P       | Effect | Freq | P       | Effect | Freq |
| rs1467311  | 9q31.2    | G             | 1.0E-06 | 0.04   | 0.24 | 9.4E-03 | 0.01   | 0.29 |
| rs9933309  | CYBA      | C             | 1.1E-08 | 0.07   | 0.38 | 1.2E-04 | 0.02   | 0.29 |
| rs174570   | FADS2     | C             | 2.0E-07 | 0.04   | 0.33 | 8.5E-02 | 0.01   | 0.16 |
| rs9399137  | HBS1L/MYB | T             | 8.5E-15 | 0.07   | 0.32 | 8.1E-05 | 0.02   | 0.23 |
| rs11667918 | MYO9B     | C             | 9.0E-12 | 0.06   | 0.39 | 3.7E-05 | 0.02   | 0.24 |
| rs540078   | PSMD13    | T             | 3.2E-05 | 0.03   | 0.40 | 1.3E-01 | 0.02   | 0.06 |
| rs6684514  | TMEM79    | G             | 1.3E-23 | 0.09   | 0.22 | 4.0E-02 | -0.01  | 0.27 |

SUPPLEMENTARY DATA

**Supplementary Table 8.** The association of the HbA<sub>1c</sub> index SNPs with hemoglobin related traits. The associations were looked up from three large consortia meta-analysis, Kamatani et. al. [31], Soranzo et. al. [32] and Ganesh et. al. [33]. Hb, hemoglobin concentration; HCT, hematocrit; MCH, mean corpuscular hemoglobin; MCHC, mean corpuscular hemoglobin concentration; MCV, mean corpuscular volume; RBC, red blood cell count; PCV, packed cell volumn. Statistical significance was defined after Bonferoni correction at  $p < 0.05/17/9 = 3.3 \times 10^{-4}$ . Significant P-values were highlighted in bold.

| SNP  |         | rs6684514      | rs3755157    | rs7772603 | rs9399137      | rs1799884 | rs4737009      | rs9933309      | rs1046875 | rs11667918 |
|------|---------|----------------|--------------|-----------|----------------|-----------|----------------|----------------|-----------|------------|
| Gene |         | TMEM79         | G6PC2/ABCB11 | CDKAL1    | HBS1L/MYB      | GCK       | ANK1           | CYBA           | FN3K      | MYO9B      |
| Hb   | RIKEN   | 6.5E-02        | 5.3E-01      | 7.6E-01   | <b>2.8E-04</b> | 6.5E-01   | 7.5E-01        | 5.7E-02        | 6.5E-01   | 3.2E-01    |
|      | HaemGen | 1.9E-01        | 8.4E-01      | 2.1E-01   | <b>8.5E-08</b> | 3.6E-01   | 2.4E-03        | <b>2.6E-05</b> | 3.8E-01   | 4.7E-01    |
|      | CHARGE  | 2.4E-01        | 3.7E-01      | 9.6E-01   | <b>1.6E-10</b> | 3.6E-01   | 4.4E-01        | 2.7E-02        | 8.7E-01   | 1.1E-01    |
| HCT  | RIKEN   | 7.4E-01        | 6.5E-01      | 8.1E-01   | <b>2.6E-09</b> | 9.9E-01   | 2.2E-01        | 9.4E-01        | 7.3E-01   | 1.3E-01    |
|      | CHARGE  | 2.4E-01        | 3.7E-01      | 9.6E-01   | <b>1.6E-10</b> | 3.6E-01   | 4.4E-01        | 2.7E-02        | 8.7E-01   | 1.1E-01    |
| MCH  | RIKEN   | 2.4E-01        | 5.4E-01      | 1.7E-01   | <b>2.1E-54</b> | 5.3E-01   | 5.7E-01        | 4.4E-01        | 2.3E-01   | 9.7E-01    |
|      | HaemGen | 1.3E-01        | 9.6E-01      | 9.2E-01   | <b>4.8E-91</b> | 4.5E-01   | 2.9E-01        | 1.1E-01        | 1.5E-01   | 3.4E-02    |
|      | CHARGE  | 5.6E-01        | 5.8E-01      | 6.1E-01   | <b>2.0E-33</b> | 9.6E-01   | 7.4E-02        | 5.4E-01        | 2.3E-02   | 6.9E-01    |
| MCHC | RIKEN   | <b>3.5E-08</b> | 6.1E-01      | 3.9E-01   | <b>6.1E-09</b> | 3.6E-01   | 3.7E-04        | <b>1.2E-09</b> | 6.0E-01   | 1.4E-01    |
|      | HaemGen | 9.6E-01        | 6.1E-01      | 9.6E-01   | <b>5.0E-06</b> | 1.7E-01   | <b>4.9E-05</b> | 2.7E-03        | 1.7E-01   | 3.0E-01    |
|      | CHARGE  | 4.2E-01        | 8.9E-01      | 6.3E-01   | <b>1.7E-09</b> | 8.0E-01   | <b>4.6E-05</b> | 1.0E-01        | 7.8E-01   | 1.6E-01    |
| MCV  | RIKEN   | <b>1.5E-04</b> | 5.3E-01      | 3.1E-01   | <b>2.6E-45</b> | 6.6E-01   | 3.0E-02        | <b>5.9E-05</b> | 1.9E-01   | 6.7E-01    |
|      | HaemGen | 1.9E-02        | 3.5E-01      | 4.2E-01   | <b>1.2E-88</b> | 1.8E-01   | <b>3.6E-06</b> | 8.6E-02        | 3.7E-01   | 2.0E-03    |
|      | CHARGE  | 6.3E-01        | 5.4E-01      | 4.5E-01   | <b>6.9E-57</b> | 9.2E-01   | <b>1.2E-04</b> | 8.4E-01        | 5.4E-03   | 4.3E-01    |
| RBC  | RIKEN   | 2.6E-02        | 5.7E-01      | 7.5E-01   | <b>4.2E-40</b> | 6.8E-01   | 8.4E-01        | 8.4E-02        | 1.0E+00   | 1.7E-01    |
|      | CHARGE  | 6.5E-01        | 2.6E-01      | 1.7E-01   | <b>1.0E-18</b> | 7.4E-01   | 2.8E-01        | 6.8E-02        | 1.0E+00   | 5.6E-01    |
| PCV  | HaemGen | 3.6E-01        | 7.4E-01      | 4.9E-01   | <b>1.2E-17</b> | 9.1E-01   | 2.7E-01        | 3.0E-01        | 8.2E-02   | 9.5E-01    |



SUPPLEMENTARY DATA

**Supplementary Table 9.** The effects of the association with hemoglobin related traits of the HbA<sub>1c</sub> index SNPs.

| SNP     |         | rs6684514     | rs3755157    | rs7772603 | rs9399137     | rs1799884 | rs4737009     | rs9933309     | rs1046875 | rs11667918 |
|---------|---------|---------------|--------------|-----------|---------------|-----------|---------------|---------------|-----------|------------|
| Gene    |         | TMEM79        | G6PC2/ABCB11 | CDKAL1    | HBS1L/MYB     | GCK       | ANK1          | CYBA          | FN3K      | MYO9B      |
| Alleles |         | G/A           | C/T          | C/T       | C/T           | T/C       | A/G           | T/C           | A/G       | C/T        |
| Hb      | RIKEN   | 0.033         | 0.009        | -0.005    | <b>-0.055</b> | 0.009     | 0.006         | 0.028         | 0.007     | 0.016      |
|         | HaemGen | 0.009         | -0.002       | 0.008     | <b>-0.035</b> | 0.008     | -0.023        | <b>0.029</b>  | -0.006    | -0.006     |
|         | CHARGE  | -0.038        | -0.040       | 0.001     | <b>-0.198</b> | 0.033     | 0.025         | 0.076         | -0.005    | 0.049      |
| HCT     | RIKEN   | 0.017         | 0.019        | -0.010    | <b>-0.256</b> | 0.000     | 0.067         | 0.003         | 0.015     | 0.069      |
|         | CHARGE  | -0.038        | -0.040       | 0.001     | <b>-0.198</b> | 0.033     | 0.025         | 0.076         | -0.005    | 0.049      |
| MCH     | RIKEN   | -0.001        | 0.000        | -0.001    | <b>0.011</b>  | 0.001     | 0.001         | -0.001        | 0.001     | 0.000      |
|         | HaemGen | 0.018         | -0.001       | 0.001     | <b>0.239</b>  | -0.011    | 0.014         | 0.021         | 0.017     | 0.029      |
|         | CHARGE  | -0.001        | 0.001        | 0.000     | <b>0.009</b>  | 0.000     | 0.002         | 0.001         | -0.003    | 0.000      |
| MCHC    | RIKEN   | <b>0.002</b>  | 0.000        | 0.000     | <b>0.002</b>  | 0.000     | -0.001        | <b>0.002</b>  | 0.000     | 0.000      |
|         | HaemGen | 0.000         | 0.003        | 0.000     | <b>0.019</b>  | -0.006    | <b>-0.018</b> | 0.013         | 0.006     | -0.005     |
|         | CHARGE  | 0.000         | 0.000        | 0.000     | <b>0.002</b>  | 0.000     | <b>-0.002</b> | 0.001         | 0.000     | -0.001     |
| MCV     | RIKEN   | <b>-0.003</b> | 0.000        | -0.001    | <b>0.009</b>  | 0.000     | 0.002         | <b>-0.002</b> | 0.001     | 0.000      |
|         | HaemGen | 0.071         | -0.039       | -0.023    | <b>0.601</b>  | -0.050    | <b>0.156</b>  | -0.057        | 0.027     | 0.111      |
|         | CHARGE  | 0.000         | 0.001        | 0.000     | <b>0.008</b>  | 0.000     | <b>0.002</b>  | 0.000         | -0.002    | 0.000      |
| RBC     | RIKEN   | 0.003         | 0.001        | 0.000     | <b>-0.016</b> | -0.001    | 0.000         | 0.002         | 0.000     | 0.002      |
|         | CHARGE  | -0.001        | -0.003       | 0.002     | <b>-0.013</b> | 0.001     | -0.002        | 0.004         | 0.000     | -0.001     |
| PCV     | HaemGen | 0.019         | 0.010        | 0.013     | <b>-0.175</b> | -0.003    | -0.026        | 0.023         | -0.037    | 0.002      |

The effects in bold are those significant as showed in Supplementary Table S8. All the effects are beta coefficients

**Reference**

1. Liang J, Zhou N, Teng F, Zou C, Xue Y, et al. (2012) Hemoglobin A1c levels and aortic arterial stiffness: the Cardiometabolic Risk in Chinese (CRC) study. *PLoS one* 7: e38485.
2. Cho YS, Go MJ, Kim YJ, Heo JY, Oh JH, et al. (2009) A large-scale genome-wide association study of Asian populations uncovers genetic factors influencing eight quantitative traits. *Nature genetics* 41: 527-534.
3. Hanas R, John G (2010) 2010 consensus statement on the worldwide standardization of the hemoglobin A1C measurement. *Diabetes care* 33: 1903-1904.
4. Takeuchi F, Serizawa M, Yamamoto K, Fujisawa T, Nakashima E, et al. (2009) Confirmation of multiple risk loci and genetic impacts by a genome-wide association study of type 2 diabetes in the Japanese population. *Diabetes* 58: 1690-1699.
5. Wu Y, Li H, Loos RJ, Yu Z, Ye X, et al. (2008) Common variants in CDKAL1, CDKN2A/B, IGF2BP2, SLC30A8, and HHEX/IDE genes are associated with type 2 diabetes and impaired fasting glucose in a Chinese Han population. *Diabetes* 57: 2834-2842.
6. Foong AW, Saw SM, Loo JL, Shen S, Loon SC, et al. (2007) Rationale and methodology for a population-based study of eye diseases in Malay people: The Singapore Malay eye study (SiMES). *Ophthalmic epidemiology* 14: 25-35.
7. Sabanayagam C, Liew G, Tai ES, Shankar A, Lim SC, et al. (2009) Relationship between glycated haemoglobin and microvascular complications: is there a natural cut-off point for the diagnosis of diabetes? *Diabetologia* 52: 1279-1289.
8. Lavanya R, Jeganathan VS, Zheng Y, Raju P, Cheung N, et al. (2009) Methodology of the Singapore Indian Chinese Cohort (SICC) eye study: quantifying ethnic variations in the epidemiology of eye diseases in Asians. *Ophthalmic epidemiology* 16: 325-336.
9. Hughes K, Yeo PP, Lun KC, Thai AC, Sothy SP, et al. (1990) Cardiovascular diseases in Chinese, Malays, and Indians in Singapore. II. Differences in risk factor levels. *Journal of epidemiology and community health* 44: 29-35.
10. Tan CE, Emmanuel SC, Tan BY, Jacob E (1999) Prevalence of diabetes and ethnic differences in cardiovascular risk factors. The 1992 Singapore National Health Survey. *Diabetes care* 22: 241-247.
11. Hughes K, Aw TC, Kuperan P, Choo M (1997) Central obesity, insulin resistance, syndrome X, lipoprotein(a), and cardiovascular risk in Indians, Malays, and Chinese in Singapore. *Journal of epidemiology and community health* 51: 394-399.
12. Cutter J, Tan BY, Chew SK (2001) Levels of cardiovascular disease risk factors in Singapore following a national intervention programme. *Bulletin of the World Health Organization* 79: 908-915.
13. Gao H, Kim YM, Chen P, Igase M, Kawamoto R, et al. (2013) Genetic variation in CDH13 is associated with lower plasma adiponectin levels, but greater adiponectin sensitivity in East Asian populations. *Diabetes*.
14. Pan WH, Fann CS, Wu JY, Hung YT, Ho MS, et al. (2006) Han Chinese cell and genome bank in Taiwan: purpose, design and ethical considerations. *Human heredity* 61: 27-30.
15. Pan WH, Chang HY, Yeh WT, Hsiao SY, Hung YT (2001) Prevalence, awareness, treatment and control of hypertension in Taiwan: results of Nutrition and Health Survey in Taiwan (NAHSIT) 1993-1996. *Journal of human hypertension* 15: 793-798.
16. Hankin JH, Stram DO, Arakawa K, Park S, Low SH, et al. (2001) Singapore Chinese Health Study: development, validation, and calibration of the quantitative food frequency questionnaire. *Nutrition and cancer* 39: 187-195.

## SUPPLEMENTARY DATA

17. Gao YT, Shu XO, Dai Q, Potter JD, Brinton LA, et al. (2000) Association of menstrual and reproductive factors with breast cancer risk: results from the Shanghai Breast Cancer Study. *International journal of cancer Journal international du cancer* 87: 295-300.
18. Zheng W, Long J, Gao YT, Li C, Zheng Y, et al. (2009) Genome-wide association study identifies a new breast cancer susceptibility locus at 6q25.1. *Nature genetics* 41: 324-328.
19. Kuo JZ, Sheu WH, Assimes TL, Hung YJ, Absher D, et al. (2013) Trans-ethnic fine mapping identifies a novel independent locus at the 3' end of CDKAL1 and novel variants of several susceptibility loci for type 2 diabetes in a Han Chinese population. *Diabetologia*.
20. Nanri A, Yoshida D, Yamaji T, Mizoue T, Takayanagi R, et al. (2008) Dietary patterns and C-reactive protein in Japanese men and women. *The American journal of clinical nutrition* 87: 1488-1496.
21. Tabara Y, Kohara K, Miki T (2012) Hunting for genes for hypertension: the Millennium Genome Project for Hypertension. *Hypertension research : official journal of the Japanese Society of Hypertension* 35: 567-573.
22. Soranzo N, Sanna S, Wheeler E, Gieger C, Radke D, et al. (2010) Common variants at 10 genomic loci influence hemoglobin A<sub>1c</sub> levels via glycemic and nonglycemic pathways. *Diabetes* 59: 3229-3268.
23. Paré G, Chasman D, Parker A, Nathan D, Miletich J, et al. (2008) Novel association of HK1 with glycated hemoglobin in a non-diabetic population: a genome-wide evaluation of 14,618 participants in the Women's Genome Health Study. *PLoS genetics* 4(12).
24. Ryu J, Lee C (2012) Association of glycosylated hemoglobin with the gene encoding CDKAL1 in the Korean Association Resource (KARE) study. *Human mutation* 33: 655-664.
25. Franklin CS, Aulchenko YS, Huffman JE, Vitart V, Hayward C, et al. (2010) The TCF7L2 diabetes risk variant is associated with HbA<sub>1c</sub> levels: a genome-wide association meta-analysis. *Annals of human genetics* 74: 471-478.
26. Morris AP, Voight BF, Teslovich TM, Ferreira T, Segre AV, et al. (2012) Large-scale association analysis provides insights into the genetic architecture and pathophysiology of type 2 diabetes. *Nature genetics* 44: 981-990.
27. Dupuis J, Langenberg C, Prokopenko I, Saxena R, Soranzo N, et al. (2010) New genetic loci implicated in fasting glucose homeostasis and their impact on type 2 diabetes risk. *Nature genetics* 42: 105-121.
28. Saxena R, Hivert MF, Langenberg C, Tanaka T, Pankow JS, et al. (2010) Genetic variation in GIPR influences the glucose and insulin responses to an oral glucose challenge. *Nature genetics* 42: 142-148.
29. Cho YS, Chen CH, Hu C, Long J, Ong RT, et al. (2012) Meta-analysis of genome-wide association studies identifies eight new loci for type 2 diabetes in east Asians. *Nature genetics* 44: 67-72.
30. Kim YJ, Go MJ, Hu C, Hong CB, Kim YK, et al. (2011) Large-scale genome-wide association studies in East Asians identify new genetic loci influencing metabolic traits. *Nature genetics* 43: 990-995.
31. Kamatani Y, Matsuda K, Okada Y, Kubo M, Hosono N, et al. (2010) Genome-wide association study of hematological and biochemical traits in a Japanese population. *Nature genetics* 42: 210-215.
32. Soranzo N, Spector TD, Mangino M, Kuhnel B, Rendon A, et al. (2009) A genome-wide meta-analysis identifies 22 loci associated with eight hematological parameters in the HaemGen consortium. *Nature genetics* 41: 1182-1190.
33. Ganesh SK, Zakai NA, van Rooij FJ, Soranzo N, Smith AV, et al. (2009) Multiple loci influence erythrocyte phenotypes in the CHARGE Consortium. *Nature genetics* 41: 1191-1198.
